# Supplementary material for: Liver Metastases of Intrahepatic Cholangiocarcinoma: Implications for an Updated Staging System
Source: PubMed Central journal article supplement — Hepatology. 2021 Jun 18;73(6):2311–25. doi: 10.1002/hep.31598 (PMC8252018; doi:10.1002/hep.31598), 2021-06-18
Supplement: HEP-73-2311-s001.pdf [file HEP-73-2311-s001.pdf]

**Supplementary material 1: Univariate survival analysis (A: Training cohort; B: Internal validation; C: Whole ENS-CCA series; D: External Validation cohort (SEER)), exploring impact of staging systems on OS**

AJCC: American Joint Committee on Cancer (AJCC); mAJCC: modified staging system; HR: Hazard Ratio; CI: confidence interval; ENS-CCA: European Network for the Study of Cholangiocarcinoma; SEER: Surveillance, Epidemiology, and End Results; OS: overall survival; %: percentage; N: number; mts: metastases; Ref: reference; n/a: not applicable

| A: Training cohort (ENS-CCA) (N=141) |                                                          | N  | %     | Median OS (95% CI) |              | Log-Rank p-value | Univariate Cox Regression HR (95% CI) | P-value |
|--------------------------------------|----------------------------------------------------------|----|-------|--------------------|--------------|------------------|---------------------------------------|---------|
| AJCC v.7                             | Stage I-III (including T2bN0M0; liver satellite lesions) | 43 | 30.50 | 10.97              | (6.96-16.95) | 0.0125           | 1 (Ref)                               | n/a     |
|                                      | Stage IVa (including T2bN1M0)                            | 28 | 19.86 | 15.01              | (6.04-19.05) |                  | 1.04 (0.64-1.71)                      | 0.867   |
|                                      | Stage IVb (distant mts)                                  | 70 | 49.65 | 7.03               | (4.01-10.97) |                  | 1.69 (1.13-2.53)                      | 0.011   |
| mAJCC v.7                            | Group A: Stage I-III (excluding T2bN0M0)                 | 13 | 9.22  | 15.01              | (5.94-26.04) | 0.0269           | 1 (Ref)                               | n/a     |
|                                      | Group B: Stage IVa (excluding T2bN1M0)                   | 20 | 14.18 | 14.97              | (4.01-22.99) |                  | 1.23 (0.57-2.63)                      | 0.592   |

|           |                                                        |    |       |                    |        |                  |       |
|-----------|--------------------------------------------------------|----|-------|--------------------|--------|------------------|-------|
|           | <b>Group C: Stage T2bN0/1M0: liver mts</b>             | 38 | 26.95 | 9.98 (5.94-16.06)  |        | 1.30 (0.65-2.64) | 0.460 |
|           | <b>Group D: Stage IVb</b>                              | 70 | 49.65 | 7.03 (4.01-10.97)  |        | 2.03 (1.04-3.96) | 0.037 |
| mAJCC v.7 | <b>Group A: Stage I-III (<u>excluding</u> T2bN0M0)</b> | 13 | 9.22  | 15.01 (5.94-26.04) | 0.0269 | 0.77 (0.38-1.55) | 0.460 |
|           | <b>Group B: Stage IVa (<u>excluding</u> T2bN1M0)</b>   | 20 | 14.18 | 14.97 (4.01-22.99) |        | 0.94 (0.54-1.64) | 0.838 |
|           | <b>Group C: Stage T2bN0/1M0: liver mts</b>             | 38 | 26.95 | 9.98 (5.94-16.06)  |        | 1 (Ref)          | n/a   |
|           | <b>Group D: Stage IVb</b>                              | 70 | 49.65 | 7.03 (4.01-10.97)  |        | 1.56 (1.03-2.35) | 0.034 |

| B: Internal validation cohort (ENSCCA) (N=433) |                                                          | N   | %     | Median OS (95% CI)  | Log-Rank p-value | Univariate Cox Regression HR (95% CI) | P-value |
|------------------------------------------------|----------------------------------------------------------|-----|-------|---------------------|------------------|---------------------------------------|---------|
| AJCC v.7                                       | Stage I-III (including T2bN0M0; liver satellite lesions) | 224 | 51.73 | 32.51 (26.73-38.95) | <0.001           | 1 (Ref)                               | n/a     |
|                                                | Stage IVa (including T2bN1M0)                            | 100 | 23.09 | 11.92 (9.26-16.68)  |                  | 2.49 (1.85-3.36)                      | <0.001  |
|                                                | Stage IVb (distant mts)                                  | 109 | 25.17 | 9.26 (5.94-11.36)   |                  | 3.23 (2.42-4.29)                      | <0.001  |
| mAJCC v.7                                      | Group A: Stage I-III (excluding T2bN0M0)                 | 179 | 41.34 | 36.95 (28.24-47.06) | <0.001           | 1 (Ref)                               | n/a     |
|                                                | Group B: Stage IVa (excluding T2bN1M0)                   | 69  | 15.94 | 14.22 (10.34-26.69) |                  | 2.38 (1.65-3.43)                      | <0.001  |
|                                                | Group C: Stage T2bN0/1M0: liver mts                      | 76  | 17.55 | 11.82 (7.16-16.72)  |                  | 3.25 (2.29-4.59)                      | <0.001  |
|                                                | Group D: Stage IVb                                       | 109 | 25.17 | 9.26 (5.94-11.36)   |                  | 3.89 (2.85-5.30)                      | <0.001  |
| mAJ                                            | Group A: Stage I-III (excluding T2bN0M0)                 | 179 | 41.34 | 36.95 (28.24-47.06) | <0.001           | 0.31 (0.22-0.44)                      | <0.001  |

|  |                                                   |     |       |                         |  |                  |       |
|--|---------------------------------------------------|-----|-------|-------------------------|--|------------------|-------|
|  | <b>Group B: Stage IVa<br/>(excluding T2bN1M0)</b> | 69  | 15.94 | 14.22 (10.34-<br>26.69) |  | 0.73 (0.49-1.08) | 0.114 |
|  | <b>Group C: Stage<br/>T2bN0/1M0: liver mts</b>    | 76  | 17.55 | 11.82 (7.16-<br>16.72)  |  | 1 (Ref)          | n/a   |
|  | <b>Group D: Stage IVb</b>                         | 109 | 25.17 | 9.26 (5.94-<br>11.36)   |  | 1.19 (0.86-1.67) | 0.290 |

| C: Whole ENS-CCA series (N=574) |                                                                  | N   | %     | Median OS (95% CI) |               | Log-Rank p-value | Univariate Cox Regression HR (95% CI) | P-value |
|---------------------------------|------------------------------------------------------------------|-----|-------|--------------------|---------------|------------------|---------------------------------------|---------|
| AJCC v.7                        | Stage I-III ( <u>including</u> T2bN0M0; liver satellite lesions) | 267 | 46.52 | 26.96              | (22.89-32.51) | <0.001           | 1 (Ref)                               | n/a     |
|                                 | Stage IVa ( <u>including</u> T2bN1M0)                            | 128 | 22.30 | 13.01              | (9.79-16.06)  |                  | 2.16 (1.67-2.78)                      | <0.001  |
|                                 | Stage IVb (distant mts)                                          | 179 | 31.18 | 8.44               | (5.94-10.25)  |                  | 3.06 (2.43-3.86)                      | <0.001  |
| mAJCC v.7                       | Group A: Stage I-III ( <u>excluding</u> T2bN0M0)                 | 192 | 33.45 | 34.09              | (27.32-41.84) | <0.001           | 1 (Ref)                               | n/a     |
|                                 | Group B: Stage IVa ( <u>excluding</u> T2bN1M0)                   | 89  | 15.51 | 14.98              | (11.63-21.74) |                  | 2.42 (1.76-3.33)                      | <0.001  |
|                                 | Group C: Stage T2bN0/1M0: liver mts                              | 114 | 19.86 | 10.97              | (7.45-15.99)  |                  | 3.10 (2.30-4.18)                      | <0.001  |
|                                 | Group D: Stage IVb                                               | 179 | 31.18 | 8.44               | (5.94-10.25)  |                  | 4.11 (3.14-5.37)                      | <0.001  |

|           |                                                 |     |       |                     |        |                  |        |
|-----------|-------------------------------------------------|-----|-------|---------------------|--------|------------------|--------|
| mAJCC v.7 | <b>Group A: Stage I-III (excluding T2bN0M0)</b> | 192 | 33.45 | 34.09 (27.32-41.84) | <0.001 | 0.32 (0.24-0.43) | <0.001 |
|           | <b>Group B: Stage IVa (excluding T2bN1M0)</b>   | 89  | 15.51 | 14.98 (11.63-21.74) |        | 0.78 (0.57-1.07) | 0.122  |
|           | <b>Group C: Stage T2bN0/1M0: liver mts</b>      | 114 | 19.86 | 10.97 (7.45-15.99)  |        | 1 (Ref)          | n/a    |
|           | <b>Group D: Stage IVb</b>                       | 179 | 31.18 | 8.44 (5.94-10.25)   |        | 1.32 (1.02-1.71) | 0.032  |

| D : External validation cohort (SEER)<br>(N=4,171) |                                                          | N     | %     | Median OS<br>(95% CI) | Log-Rank<br>p-value | Univariate Cox<br>Regression HR<br>(95% CI) | P-value |
|----------------------------------------------------|----------------------------------------------------------|-------|-------|-----------------------|---------------------|---------------------------------------------|---------|
| AJCC v.7                                           | Stage I-III (including T2bN0M0; liver satellite lesions) | 1,813 | 43.47 | 16 (14-17)            | <0.001              | 1 (Ref)                                     | n/a     |
|                                                    | Stage IVa (including T2bN1M0)                            | 676   | 16.21 | 12 (11-14)            |                     | 1.39 (1.26-1.55)                            | <0.001  |
|                                                    | Stage IVb (distant mts)                                  | 1,682 | 40.33 | 6 (6-7)               |                     | 2.21 (2.04-2.39)                            | <0.001  |
| mAJCC v.7                                          | Group A: Stage I-III (excluding T2bN0M0)                 | 1,255 | 30.09 | 19 (17-21)            | <0.001              | 1 (Ref)                                     | n/a     |
|                                                    | Group B: Stage IVa (excluding T2bN1M0)                   | 512   | 12.28 | 13 (11-14)            |                     | 1.60 (1.42-1.81)                            | <0.001  |
|                                                    | Group C: Stage T2bN0/1M0: liver mts                      | 722   | 17.31 | 10 (9-11)             |                     | 1.88 (1.68-2.09)                            | <0.001  |
|                                                    | Group D: Stage IVb                                       | 1,682 | 40.33 | 6 (6-7)               |                     | 2.66 (2.42-2.92)                            | <0.001  |
| mAJ                                                | Group A: Stage I-III (excluding T2bN0M0)                 | 1,255 | 30.09 | 19 (17-21)            | <0.001              | 0.53 (0.48-0.59)                            | <0.001  |

|  |                                                   |       |       |            |  |                  |        |
|--|---------------------------------------------------|-------|-------|------------|--|------------------|--------|
|  | <b>Group B: Stage IVa<br/>(excluding T2bN1M0)</b> | 512   | 12.28 | 13 (11-14) |  | 0.85 (0.75-0.97) | 0.017  |
|  | <b>Group C: Stage<br/>T2bN0/1M0: liver mts</b>    | 722   | 17.31 | 10 (9-11)  |  | 1 (Ref)          | n/a    |
|  | <b>Group D: Stage IVb</b>                         | 1,682 | 40.33 | 6 (6-7)    |  | 1.42 (1.28-1.57) | <0.001 |



**Supplementary material 2: Stepwise Cox Regression analysis in the training (overall survival)**

AJCC: American Joint Committee on Cancer (AJCC); mAJCC: modified staging system; ECOG-PS: Eastern Cooperative Oncology Group performance status HR: Hazard Ratio; CI: confidence interval.

| Stepwise Cox Regression |                     | Training cohort (n=122) |         |
|-------------------------|---------------------|-------------------------|---------|
| Overall Survival        |                     | HR (95% CI)             | P-value |
| Gender                  | Male (vs Female)    | 0.91 (0.61-1.36)        | 0.650   |
| Age (years)             | Continuous variable | 1.01 (0.99-1.03)        | 0.135   |
| Ethnicity               | Continuous variable | 0.84 (0.59-1.19)        | 0.338   |
| Obesity                 | Yes (vs No)         | 0.56 (0.34-0.91)        | 0.018   |
| Diabetes                | Yes (vs No)         | 1.59 (0.97-2.62)        | 0.064   |
| ECOG-PS                 | Continuous variable | 1.89 (1.51-2.39)        | <0.001  |
| Surgery                 | Yes (vs No)         | 0.53 (1.82-1.55)        | 0.249   |
| Stage (mAJCC v.7)       | Continuous variable | 1.37 (1.10-1.69)        | 0.004   |



**Supplementary material 3: Multivariable Cox Regression analysis in the training and internal validation cohorts (overall survival)**

AJCC: American Joint Committee on Cancer (AJCC); mAJCC: modified staging system; ECOG-PS: Eastern Cooperative Oncology Group performance status; HR: Hazard Ratio; CI: confidence interval; OS: overall survival; n/a: not applicable; Ref: reference; vs: versus.

| Multivariable Cox Regression |                                                   | Training cohort (n=122)   |         | Internal validation cohort (n=413) |         |
|------------------------------|---------------------------------------------------|---------------------------|---------|------------------------------------|---------|
|                              |                                                   | Multivariable HR (95% CI) | P-value | Multivariable HR (95% CI)          | P-value |
| <b>Obesity</b>               | <b>Yes (vs No)</b>                                | 0.59 (0.37-0.94)          | 0.026   | 0.92 (0.67-1.27)                   | 0.614   |
| <b>ECOG-PS</b>               | <b>Continuous variable</b>                        | 1.98 (1.57-2.50)          | <0.001  | 1.56 (1.34-1.80)                   | <0.001  |
| <b>mAJCC v.7</b>             | <b>Group A: Stage I-III (excluding T2bN0M0)</b>   | 1 (Ref)                   | n/a     | 1 (Ref)                            | n/a     |
|                              | <b>Group B: Stage IVa (excluding T2bN1M0)</b>     | 2.53 (1.18-5.42)          | 0.295   | 2.37 (1.63-3.44)                   | <0.001  |
|                              | <b>Group C: Stage T2bN0/1M0: liver metastases</b> | 2.53 (1.18-5.42)          | 0.017   | 2.93 (2.04-4.19)                   | <0.001  |
|                              | <b>Group D: Stage IVb</b>                         | 2.74 (1.37-5.46)          | 0.004   | 3.46 (2.49-4.81)                   | <0.001  |

| Multivariable Cox Regression<br>Overall Survival |                                            | Training cohort (n=122)   |         | Internal validation cohort (n=413) |         |
|--------------------------------------------------|--------------------------------------------|---------------------------|---------|------------------------------------|---------|
|                                                  |                                            | Multivariable HR (95% CI) | P-value | Multivariable HR (95% CI)          | P-value |
| Obesity                                          | Yes (vs No)                                | 0.59 (0.37-0.94)          | 0.026   | 0.92 (0.67-1.27)                   | 0.614   |
| ECOG-PS                                          | Continuous variable                        | 1.98 (1.57-2.50)          | <0.001  | 1.56 (1.34-1.80)                   | <0.001  |
| mAJCC v.7                                        | Group A: Stage I-III (excluding T2bN0M0)   | 0.39 (0.18-0.85)          | 0.017   | 0.34 (0.24-0.49)                   | <0.001  |
|                                                  | Group B: Stage IVa (excluding T2bN1M0)     | 0.60 (0.33-1.12)          | 0.109   | 0.81 (0.55-1.20)                   | 0.297   |
|                                                  | Group C: Stage T2bN0/1M0: liver metastases | 1 (Ref)                   | n/a     | 1 (Ref)                            | n/a     |
|                                                  | Group D: Stage IVb                         | 1.08 (0.69-1.71)          | 0.737   | 1.18 (0.84-1.67)                   | 0.341   |

**Supplementary material 4: Sensitivity analysis: Multivariable Cox Regression analysis whole cohort (overall survival)**

AJCC: American Joint Committee on Cancer (AJCC); mAJCC: modified staging system; HR: Hazard Ratio; CI: confidence interval; ; OS: overall survival; n/a: not applicable; Ref: reference; vs: versus.

| Multivariable Cox Regression            |                                          | Whole ENS-CCA cohort (n=535) |         |
|-----------------------------------------|------------------------------------------|------------------------------|---------|
| Overall Survival (Sensitivity analysis) |                                          | Multivariable HR (95% CI)    | P-value |
| Obesity                                 | Yes (vs No)                              | 0.83 (0.64-1.07)             | 0.158   |
| ECOG-PS                                 | Continuous variable                      | 1.68 (1.49-1.89)             | <0.001  |
| mAJCC v.7                               | Group A: Stage I-III (excluding T2bN0M0) | 1 (Ref)                      | n/a     |
|                                         | Group B: Stage IVa (including T2bN1M0)   | 2.57 (1.91-3.46)             | <0.001  |
|                                         | Group C: Stage T2bN0M0: liver metastases | 2.51 (1.76-3.56)             | <0.001  |
|                                         | Group D: Stage IVb                       | 3.38 (2.55-4.47)             | <0.001  |
| Multivariable Cox Regression            |                                          | Whole ENS-CCA cohort (n=535) |         |

| Overall Survival (Sensitivity analysis) |                                          | Multivariable HR (95% CI) | P-value |
|-----------------------------------------|------------------------------------------|---------------------------|---------|
| Obesity                                 | Yes (vs No)                              | 0.83 (0.64-1.07)          | 0.158   |
| ECOG-PS                                 | Continuous variable                      | 1.68 (1.49-1.89)          | <0.001  |
| mAJCC v.7                               | Group A: Stage I-III (excluding T2bN0M0) | 0.39 (0.28-0.57)          | <0.001  |
|                                         | Group B: Stage IVa (including T2bN1M0)   | 1.03 (0.73-1.44)          | 0.880   |
|                                         | Group C: Stage T2bN0M0: liver metastases | 1 (Ref)                   | n/a     |
|                                         | Group D: Stage IVb                       | 1.35 (0.98-1.86)          | 0.068   |

**Supplementary material 5: Surveillance, Epidemiology, and End Results (SEER) cohort (external validation)**

‰: percentage; AJCC: American Joint Committee on Cancer; mAJCC: modified staging system; CI: confidence interval; ECOG-PS: Eastern Cooperative Oncology Group performance status; N: number; SEER: Surveillance, Epidemiology and End Results

| SEER cohort (N=4,171)   |                |              |       |
|-------------------------|----------------|--------------|-------|
| Patient characteristics |                | N            | %     |
| Gender                  | Female         | 2055         | 49.27 |
|                         | Male           | 2116         | 50.73 |
| Age (years)             | Median (range) | 67 (14-99)   |       |
| Ethnicity               | Caucasian      | 3,268        | 78.35 |
|                         | Black          | 337          | 8.08  |
|                         | Other          | 559          | 13.40 |
|                         | Not reported   | 7            | 0.17  |
| Obesity                 | Yes            | Not reported |       |
| Diabetes mellitus       | Yes            | Not reported |       |
| ECOG-PS                 | Not reported   | Not reported |       |
| Staging classification  |                | N            | %     |

|                  |                                                         |       |       |
|------------------|---------------------------------------------------------|-------|-------|
| <b>AJCC v.7</b>  | <b>Stage I</b>                                          | 783   | 18.77 |
|                  | <b>Stage II</b>                                         | 804   | 19.28 |
|                  | <b>Stage III</b>                                        | 226   | 5.42  |
|                  | <b>Stage IVa</b>                                        | 676   | 16.21 |
|                  | <b>Stage IVb</b>                                        | 1,682 | 40.33 |
| <b>mAJCC v.7</b> | <b>Group A (AJCC v.7 stage I)</b>                       | 783   | 18.77 |
|                  | <b>Group A (AJCC v.7 stage II;<br/>excluding T2bN0)</b> | 246   | 5.90  |
|                  | <b>Group A (AJCC v.7 stage III)</b>                     | 226   | 5.42  |



|                                       |                                                      |           |          |
|---------------------------------------|------------------------------------------------------|-----------|----------|
|                                       | <b>Group B (AJCC v.7 stage IVa; excluding T2bN1)</b> | 512       | 12.28    |
|                                       | <b>Group C (Liver metastases; AJCC v.7 T2bN0/N1)</b> | 772       | 17.31    |
|                                       | <b>Group D (AJCC v.7 stage IVb)</b>                  | 1,682     | 40.33    |
| <b>Outcome</b>                        |                                                      | <b>N</b>  | <b>%</b> |
| <b>Status at the end of follow-up</b> | <b>Alive</b>                                         | 737       | 17.67    |
|                                       | <b>Dead</b>                                          | 3,434     | 82.33    |
| <b>Overall survival (months)</b>      | <b>Median (95% CI)</b>                               | 10 (9-10) |          |
